# Supplementary material for: Germanium quantum dot/nitrogen-doped graphene nanocomposite for high-performance bulk heterojunction solar cells
Source: Royal Society of Chemistry journal article supplement (doi:10.1039/c8ra04223c), 2018-01-01
Supplement: c8ra04223c1.pdf [file c8ra04223c1.pdf]

## Germanium quantum dot/nitrogen-doped graphene nanocomposite for high-performance bulk heterojunction solar cells

Tabitha A. Amollo,<sup>a</sup> Genevieve T. Mola,<sup>b</sup> and Vincent O. Nyamori<sup>a\*</sup>

<sup>a</sup>University of KwaZulu-Natal, Westville Campus, School of Chemistry and Physics,  
Private Bag X54001, Durban 4000, South Africa

<sup>b</sup>University of KwaZulu-Natal, Pietermaritzburg Campus, School of Chemistry and Physics,  
Private Bag X01, Scottsville, 3209, South Africa

Corresponding author: [Nyamori@ukzn.ac.za](mailto:Nyamori@ukzn.ac.za)

### Supporting information

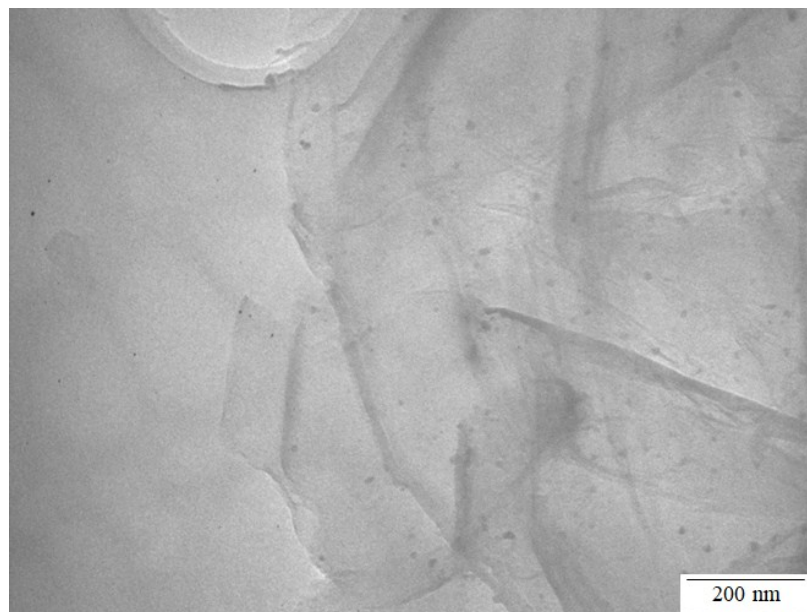

**Fig. S1** TEM image of GeQD/NGr nanocomposite.

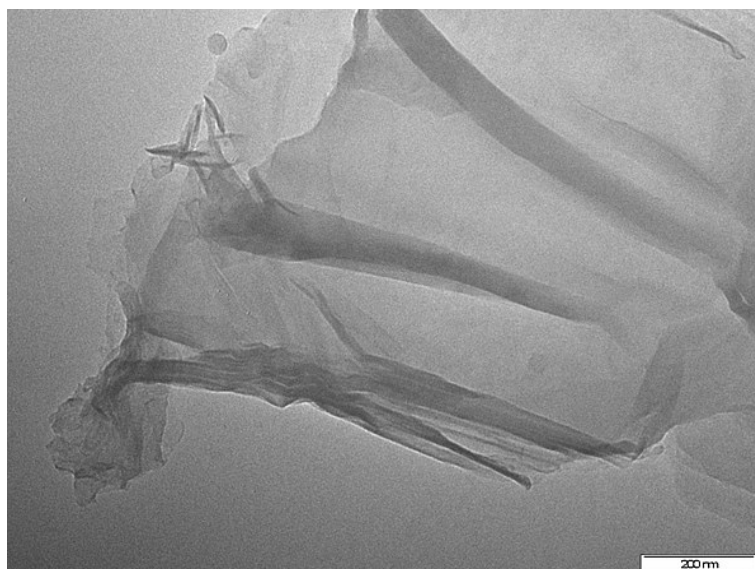

**Fig. S2** TEM image of NGr.

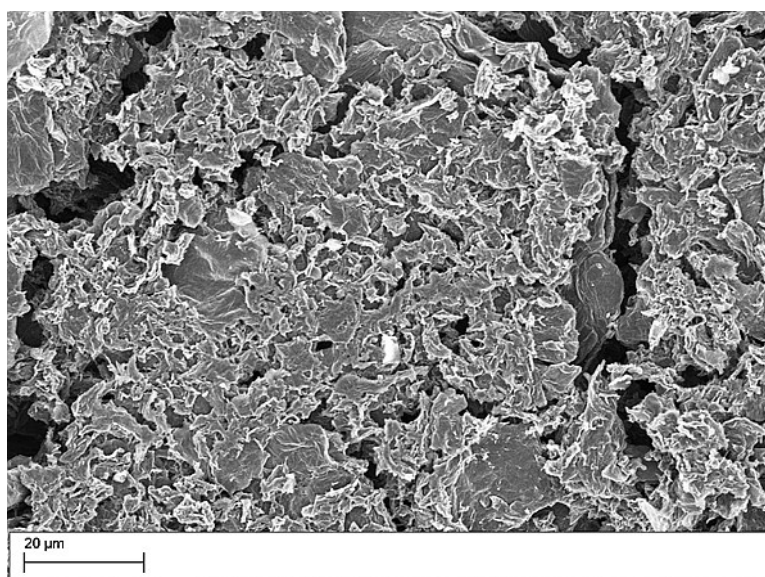

**Fig. S3** SEM image of NGr.

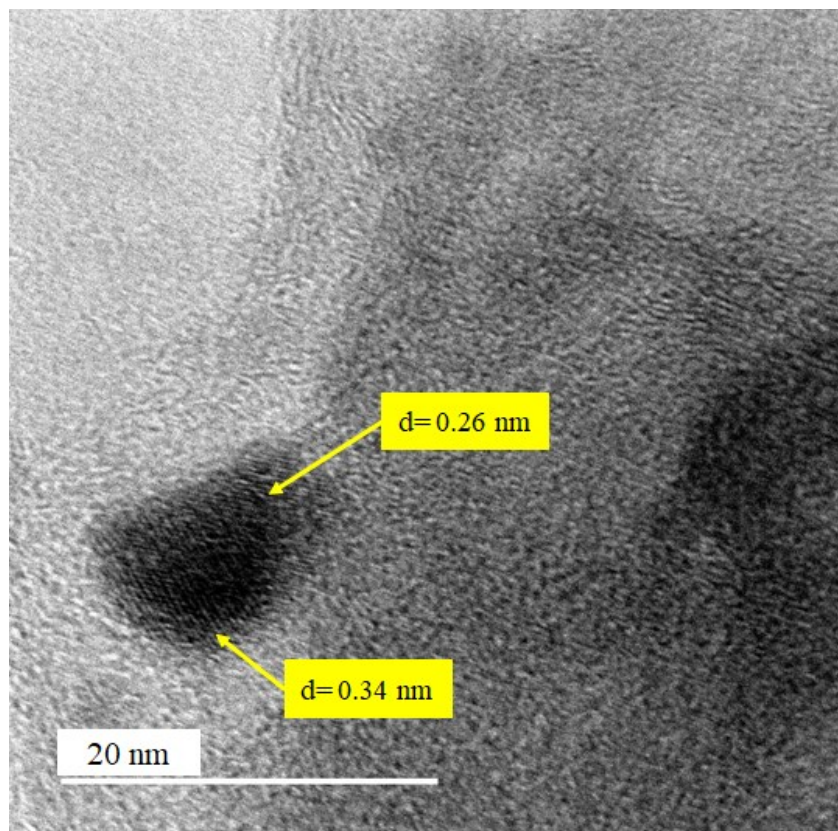

**Fig. S4** HR-TEM image of the GeQD/NGr nanocomposite.

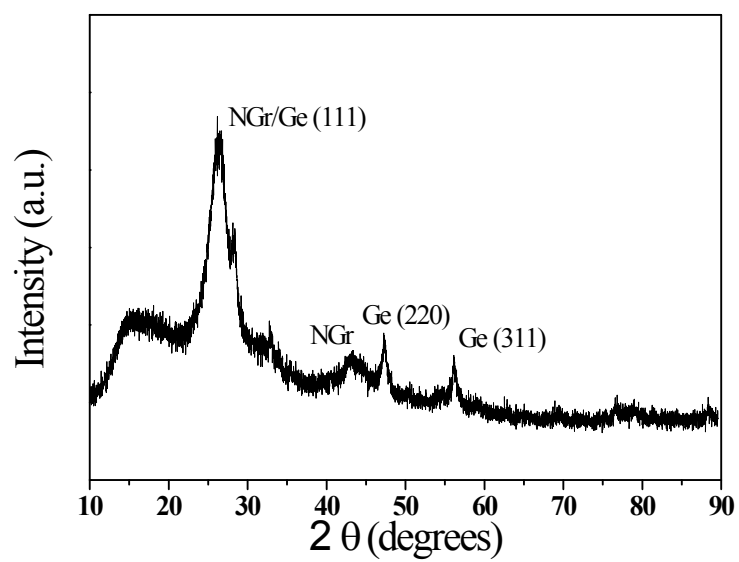

**Fig. S5** XRD pattern for the GeQD/NGr nanocomposite.

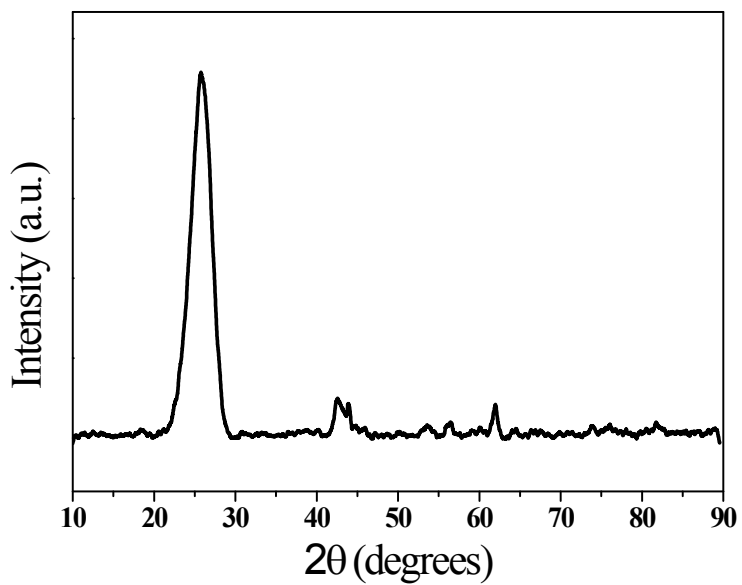

**Fig. S6** XRD pattern of NGr.

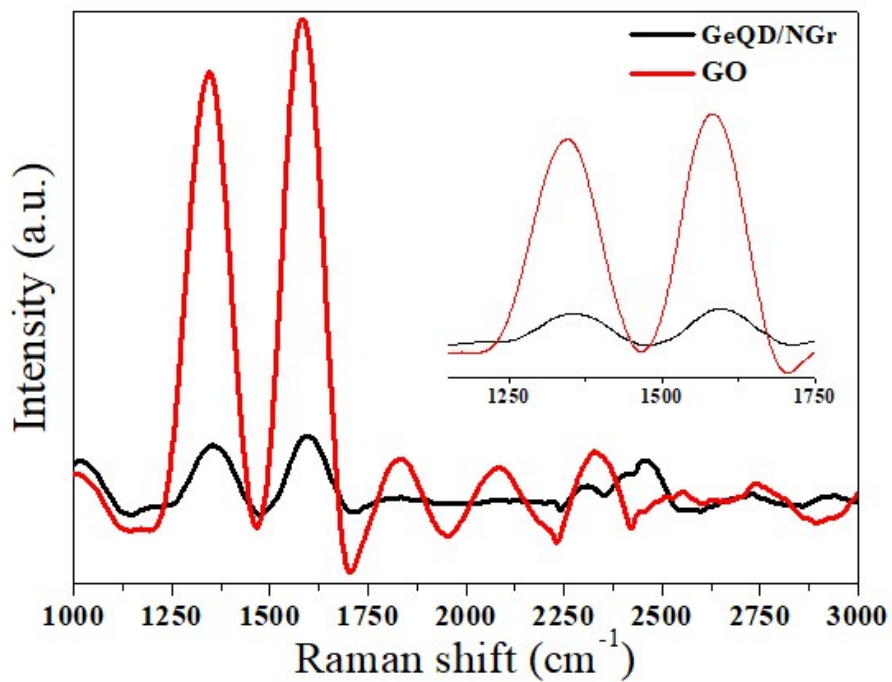

**Fig. S7** Raman spectra of the GeQD/NGr nanocomposite and GO.

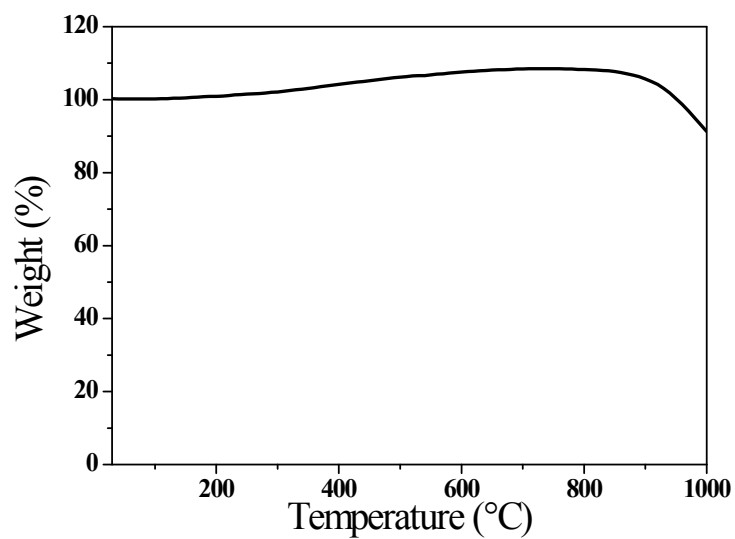

**Fig. S8** TGA thermogram of GeQD/NGr nanocomposite.

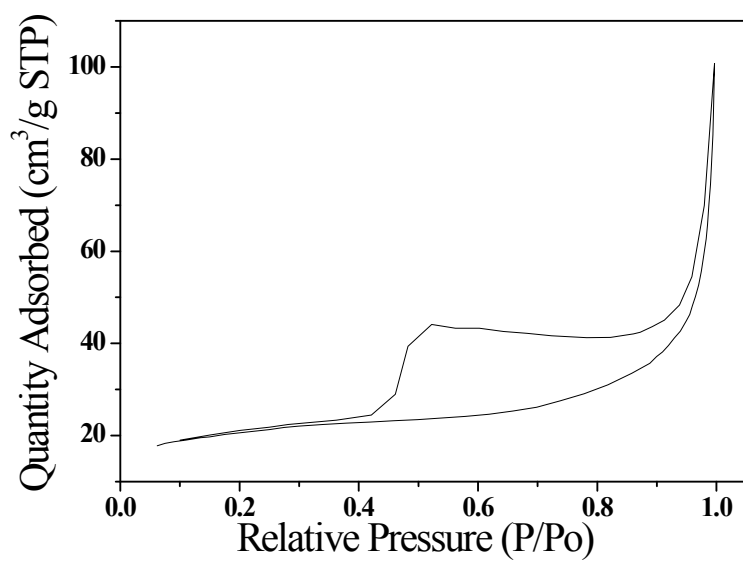

**Fig. S9** N<sub>2</sub> adsorption isotherm of the GeQD/NGr nanocomposite.

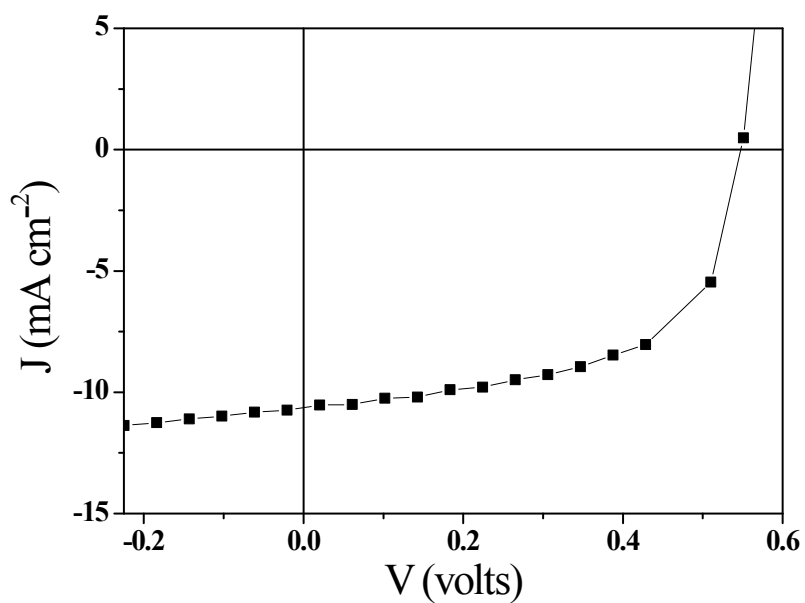

**Fig. S10** Current-voltage characteristics of BHJ-SCs with NGr (3 wt.%) in the active layer.

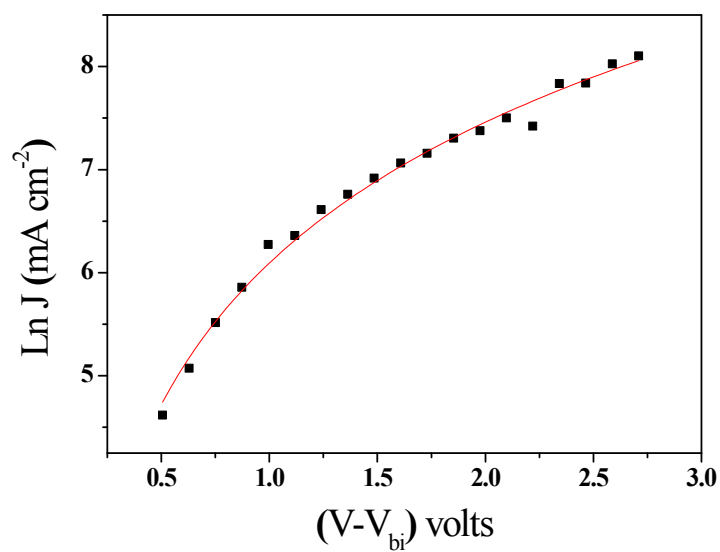

**Fig. S11** Space charge limited currents of the BHJ-SCs with NGr at 3 wt.% in the active layer.
